1 **Type I-F CRISPR-Cas resistance against virulent phage infection triggers abortive**  
2 **infection and provides population-level immunity**

3

4 Bridget N.J. Watson<sup>1#</sup>, Reuben B. Vercoe<sup>1</sup>, George P.C. Salmond<sup>2</sup>, Edze R. Westra<sup>3</sup>,  
5 Raymond H.J Staals<sup>1,4</sup> and Peter C. Fineran<sup>1,5\*</sup>

6

7 <sup>1</sup>Department of Microbiology and Immunology, University of Otago, PO Box 56, Dunedin  
8 9054, New Zealand.

9 <sup>2</sup>Department of Biochemistry, University of Cambridge, Cambridge CB2 1QW, United  
10 Kingdom.

11 <sup>3</sup>ESI, Biosciences, University of Exeter, Cornwall Campus, Penryn TR10 9FE, UK.

12 <sup>4</sup>Laboratory of Microbiology, Wageningen University and Research, 6708 WE Wageningen,  
13 The Netherlands

14 <sup>5</sup>Bio-Protection Research Centre, University of Otago, Dunedin, New Zealand.

15 <sup>#</sup>Present address: ESI, Biosciences, University of Exeter, Cornwall Campus, Penryn TR10  
16 9FE, UK.

17 \*For correspondence: [peter.fineran@otago.ac.nz](mailto:peter.fineran@otago.ac.nz)

18

19 **Type I CRISPR-Cas systems are the most abundant and widespread adaptive immune**  
20 **systems of bacteria and can greatly enhance bacterial survival in the face of temperate**  
21 **phage infection. However, it is less clear how these systems protect against virulent**  
22 **phages. Here we experimentally show that type I CRISPR immunity of *Pectobacterium***  
23 ***atrosepticum* leads to rapid suppression of two unrelated virulent phages,  $\phi$ TE and  $\phi$ M1.**  
24 **However, unlike the case where bacteria are infected with temperate phages, this is the**  
25 **result of an abortive infection-like phenotype, where infected cells do not survive the**  
26 **infection but instead become metabolically inactive and lose their membrane integrity.**  
27 **Our findings challenge the view of CRISPR-Cas as a system that protects the individual**  
28 **cell and supports growing evidence of an Abi-like function for some types of CRISPR-**  
29 **Cas systems.**

1 To respond to the pressure of phage infection, bacteria have evolved various lines of defence<sup>1-</sup>  
2 <sup>3</sup>. The adaptive arm of these defences is provided by CRISPR-Cas, which provides immunity  
3 through CRISPR RNA guided cleavage of phage genomes<sup>4,5</sup>. CRISPR-Cas systems are  
4 incredibly diverse, and are currently classified into two major classes (1 and 2), six types (I to  
5 VI) and >30 subtypes<sup>6,7</sup> (for recent reviews, see<sup>4,5,8</sup>). Crucially, recent studies revealed that at  
6 least some CRISPR-Cas variants, belonging to types VI and III, induce cell dormancy through  
7 collateral RNA cleavage following target recognition<sup>9-13</sup>. Furthermore, it is possible that type  
8 V systems induce cell death through ssDNA cleavage<sup>14</sup>. In contrast, the most abundant type I  
9 CRISPR systems, which make up around 60% of all CRISPR systems<sup>15</sup>, as well as the  
10 somewhat less common type II systems, immunity are thought to increase survival of infected  
11 individuals<sup>16,17</sup>. However, so far experimental studies on type I systems have almost  
12 exclusively focused on interactions between bacteria and filamentous phages or obligate killing  
13 mutants of temperate phages, and it is therefore less clear how bacteria with CRISPR immunity  
14 resist virulent phages. Here we explored this question using *Pectobacterium atrosepticum*,  
15 which carries a type I-F system, and two unrelated virulent phages as a model system. We  
16 found that CRISPR-Cas immunity reduced the number of cells that released phages and of  
17 those that produced progeny, the burst size was decreased. Infected cells did not survive phage  
18 infection, yet they reduced phage amplification, which provided protection at the population  
19 level. The observed CRISPR-Cas immunity phenotype to virulent phage infection has key  
20 implications for the way natural selection operates on these genes<sup>18</sup> and is analogous to that  
21 observed for kin-selected altruistic defences such as abortive infection systems, which also  
22 provide population-level benefits at high individual cost.

23

## 24 **Results**

### 25 *CRISPR-Cas reduces phage infectious centres and burst size*

26 To investigate the outcomes of phage infection in the presence of CRISPR-Cas immunity, we  
27 examined the response to phage infection by *P. atrosepticum*, which contains a type I-F  
28 system<sup>19,20</sup>. We used two different phages,  $\phi$ TE and  $\phi$ M1, members of the *Myoviridae* and  
29 *Podoviridae*, respectively. Phage infectivity was assessed using strains with one or three  
30 spacers in the chromosomal CRISPR arrays, with or without phage-targeting spacers. CRISPR-  
31 Cas provided protection against  $\phi$ TE and  $\phi$ M1 infection, reducing the efficiency of plating  
32 (EOP) by at least 10-fold, with additional spacers increasing resistance to 10<sup>5</sup>-fold (Fig. 1A,

1 Table S1). To determine what stage of phage reproduction was impeded, we investigated the  
2 effects of CRISPR-Cas on defined aspects of infection. CRISPR-Cas caused a decrease in the  
3 efficiency of centre of infection (ECOI) formation (Fig. 1B), meaning that for  $\phi$ TE, only 4 or  
4 1% of infected cells released at least one infectious phage (for the 1 $\times$  and 3 $\times$ anti- $\phi$ TE strains,  
5 respectively). Following  $\phi$ M1 infection, only 23 or 6% of cells released phages (for 1 $\times$  and  
6 3 $\times$ anti- $\phi$ M1 respectively). Next, one-step growth curves were performed to observe phage  
7 growth on the resistant hosts (Fig. S1 and Table S1). The average phage burst size was  
8 determined for each host and the number was significantly reduced by CRISPR-Cas (Fig. 1C).  
9 For  $\phi$ TE, both the 1 $\times$  or 3 $\times$ anti- $\phi$ TE strains almost completely suppressed the burst and for  
10  $\phi$ M1 it was reduced by >90% on the 3 $\times$ anti- $\phi$ M1 strain. As expected, adsorption was  
11 unaffected by CRISPR immunity (Fig. S1 and Table S1). Therefore, the *P. atrosepticum* type  
12 I-F CRISPR-Cas immunity reduced both the number of cells releasing phages and the average  
13 number of phages released per cell.

14 We previously characterised an Abi system in *P. atrosepticum*, ToxIN, which functions  
15 as a toxin-antitoxin system<sup>21,22</sup>. ToxIN provides protection against both  $\phi$ TE and  $\phi$ M1 phages,  
16 acting as an abortive infection mechanism, so we included ToxIN to compare the phenotypes  
17 provided by CRISPR-Cas and Abi immunity genes<sup>21-23</sup>. The ToxIN Abi system provided strong  
18 phage protection, reducing the EOP by 10<sup>6</sup> and 10<sup>5</sup>-fold against  $\phi$ TE and  $\phi$ M1, respectively  
19 (Fig. 1A). For both phages, only 1% of phage infected cells harbouring ToxIN released any  
20 new viral progeny (Fig. 1B) and the average burst size was undetectable (Fig. 1C). As expected  
21 for a post-adsorption phage resistance mechanism, ToxIN had no effect on adsorption (Table  
22 S1). The outcomes of ToxIN and CRISPR-Cas-mediated immunity on the different aspects of

1 infection were therefore qualitatively similar with respect to phage adsorption and  
 2 amplification.

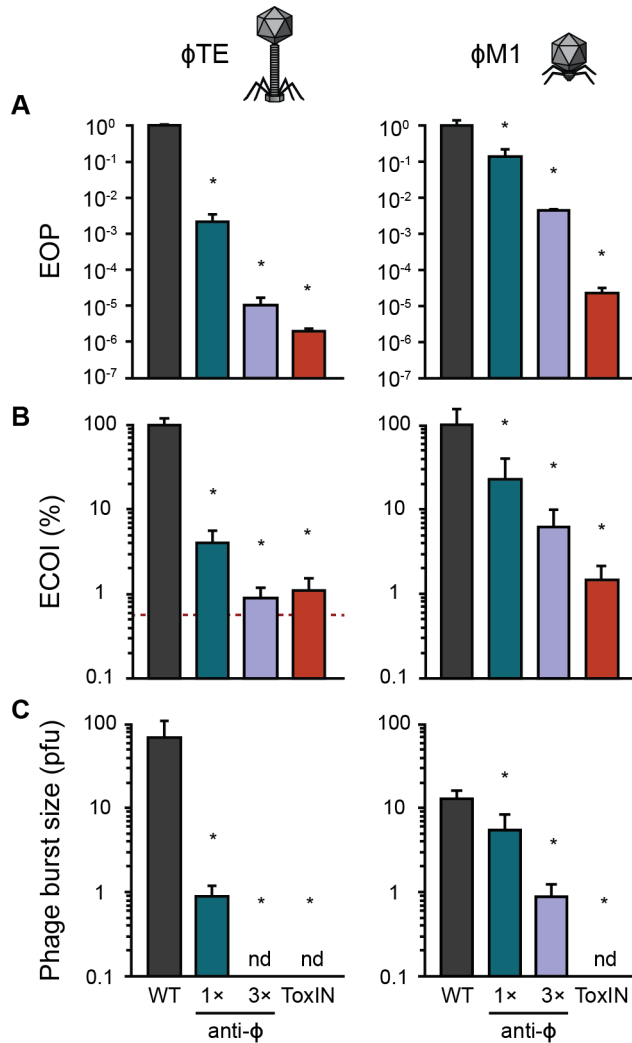

28 *The type I-F CRISPR-Cas system does not enable survival of infected cells*

29 Next, we assessed cell survival of bacteria with CRISPR-Cas immunity upon infection with  
 30 the virulent phages. Surprisingly, CRISPR-Cas immunity provided no enhancement in cell  
 31 survival measured in viable count assays compared with the phage sensitive WT or the ToxIN  
 32 Abi system (Fig. 2A), regardless of the multiplicities of infection (MOI) that were used (Fig.  
 33 S2A). To further investigate cell survival, we assessed membrane integrity and cellular  
 34 metabolic activity of phage infected cells (Fig. 2B and C, Fig. S2B and C). Phage infection led  
 35 to significant reductions in both membrane integrity and cellular metabolism even in the  
 36 presence of CRISPR-Cas or ToxIN immunity. As a control, surface mutants (i.e. bacteria  
 37 carrying mutations in the phage receptor genes on the bacterial cell surface) were isolated that  
 38 were resistant to either phage. As expected for adsorption inhibition, surface resistance against  
 39 either phage resulted in cells retaining membrane integrity and metabolic activity upon phage

1 challenge, but not when challenged with a phage that uses a different receptor (Fig. S3).  
 2 Therefore, infected *P. atrosepticum* cells bearing type I-F CRISPR-Cas immunity limit phage  
 3 propagation at the expense of the individual – akin to altruistic abortive infection.

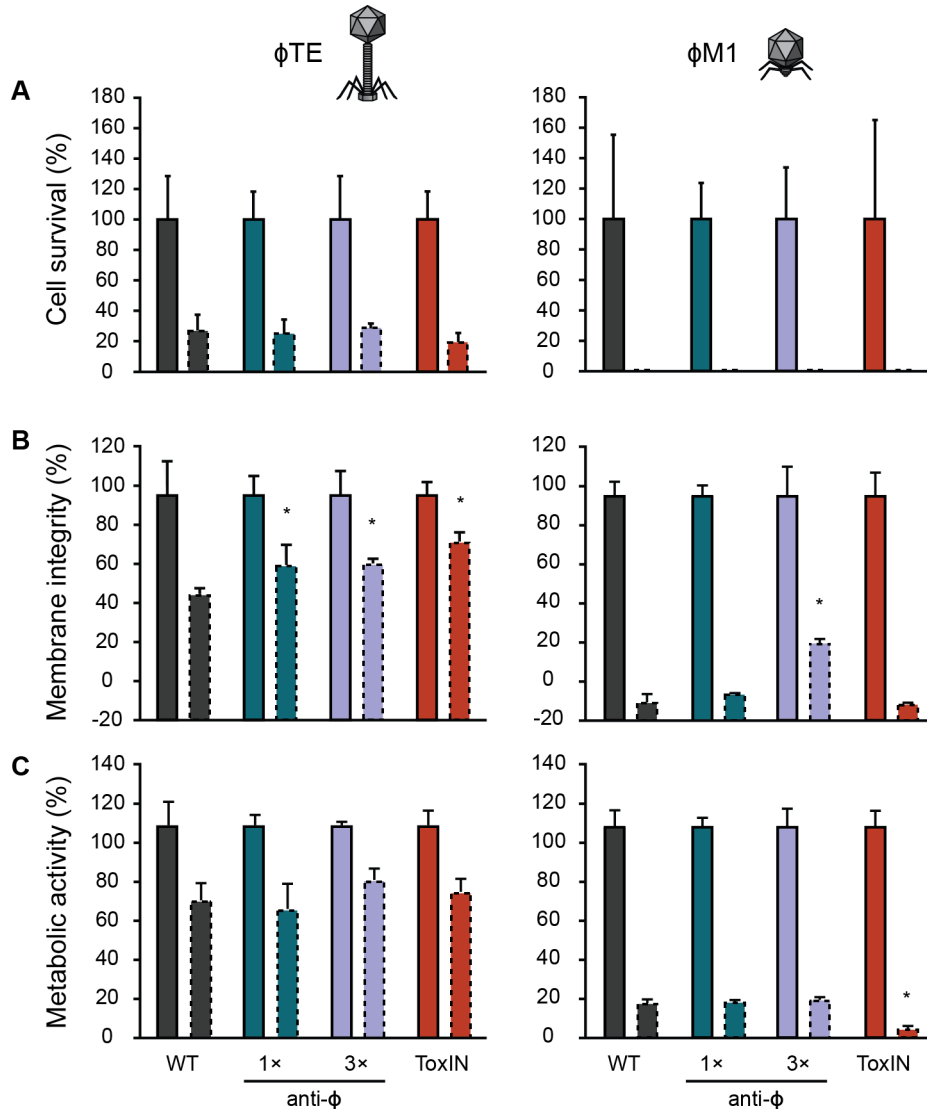

4  
 5 **Figure 2. The type I-F CRISPR-Cas system does not enable survival of infected cells. A**  
 6 Cell survival was assessed for the WT, 1 $\times$  and 3 $\times$ anti- $\phi$  strains, and ToxIN, using both  $\phi$ TE  
 7 and  $\phi$ M1 (infected at an MOI of 2). **B** The percentage of cells with intact membranes was  
 8 determined using LIVE/DEAD™ staining and **C** the percentage of metabolically active cells  
 9 was assessed using the resazurin dye. For **B** and **C** cells were infected at an MOI of 2.5. Solid  
 10 outline bars represent mock infected samples, dashed outline bars represent phage infected  
 11 samples. Statistical significance was calculated using one-way ANOVA using Dunnett’s  
 12 multiple comparison test, comparing strains with targeting spacers to the control with no-  
 13 targeting spacers. No significance was detected, unless indicated (\*  $p \leq 0.05$ ).

14 *Increased CRISPR-Cas resistance does not enhance survival of infected individuals*

15 One possible explanation why CRISPR-Cas did not promote survival following infection could  
 16 be due to an insufficient immune response, leading to incomplete phage clearance. Since the

1 phage-targeting spacers are in CRISPR arrays carrying 30 (CRISPR1) and 11 (CRISPR2) other  
 2 spacers, most effector complexes will be loaded with non-phage-targeting crRNAs. To explore  
 3 if an increased abundance of Cas complexes loaded with phage-targeting crRNAs would result  
 4 in survival of infected cells, phage targeting spacers were overexpressed from plasmids in the  
 5 presence or absence of Cas overexpression (Fig. 3). Increased phage-targeting crRNAs  
 6 significantly boosted phage resistance compared with chromosomal expression, and induction  
 7 of Cas expression further enhanced resistance, by up to  $\sim 10^4$ - $10^7$  fold compared to the WT  
 8 (Fig. 3A). However, no marked restoration in cell survival was detected compared with the  
 9 sensitive WT strain (Fig. 3B).

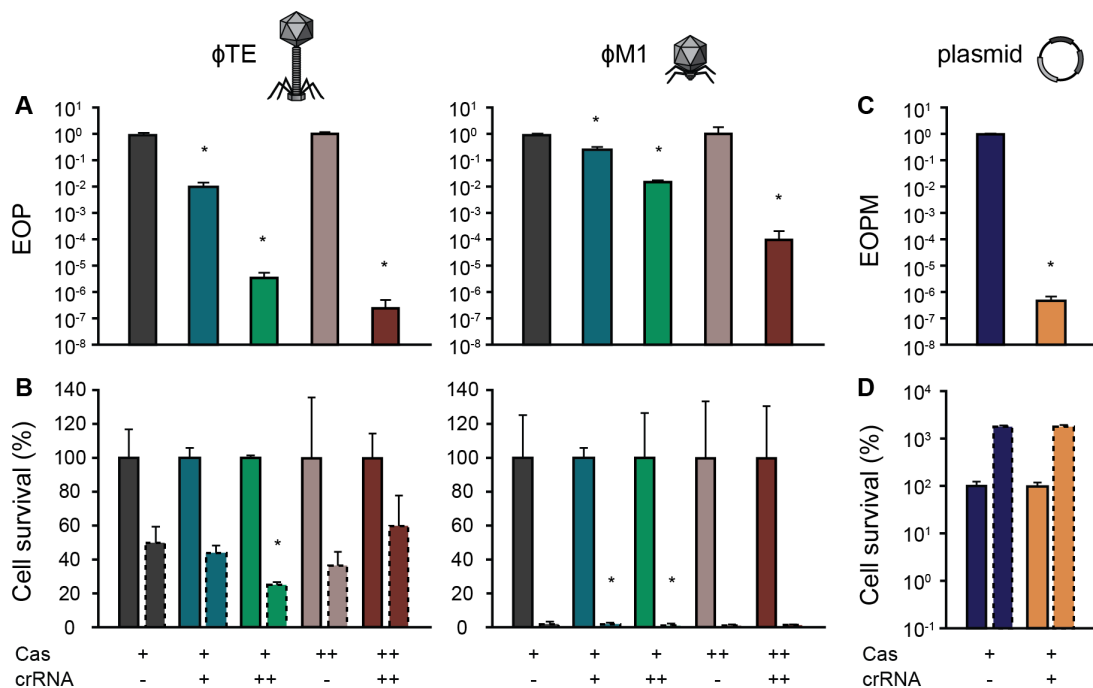

10

11 **Figure 3. CRISPR-Cas overexpression increases resistance against phages but infected**  
 12 **cells do not survive infection.** **A** Phage resistance (EOP) and **B** cell survival was assessed for  
 13 WT (with empty vector, pPF975) “Cas+ crRNA-”, 1 $\times$ anti- $\phi$  (PCF190 / PCF254 (with empty  
 14 vector), chromosomally expressed) “Cas+ crRNA+”, 1 $\times$ anti- $\phi$  plasmid (WT carrying pPF1423  
 15 / pPF1421) “Cas+ crRNA++”, Cas overexpression (PCF610 (with empty vector)) “Cas++  
 16 crRNA-” and Cas overexpression with 1 $\times$ anti- $\phi$  plasmid (PCF610, pPF1423 / pPF1421)  
 17 “Cas++ crRNA++”. Solid outline bars represent mock infected samples, dashed outline bars  
 18 represent phage infected samples. **C** Efficiency of plasmid maintenance (EOPM) and **D** cell  
 19 survival was assessed for strains carrying pTargeted (with the *expI* gene) and pControl  
 20 (inducible mini CRISPR array with no anti-*expI* spacer) “Cas+ crRNA-” or pTargeted and  
 21 pCRISPR (anti-*expI* spacer) “Cas+ crRNA+”. Solid outline bars represent CRISPR repressed  
 22 samples, dashed outline bars represent CRISPR induced samples. Statistical significance was  
 23 calculated using one-way ANOVA using Dunnett’s multiple comparison test, comparing  
 24 strains with targeting spacers to the control with no-targeting spacers. The Cas overexpression  
 25 and Cas overexpression with 1 $\times$ anti- $\phi$  plasmid strains, as well as the strains in **D**, were  
 26 compared using an unpaired T-test. No significance was detected, unless indicated (\*  $p \leq 0.05$ ).

1 While these data show that CRISPR-immune bacteria do not survive virulent phage infection  
2 even under artificially high CRISPR expression levels, it is unclear whether this is due to  
3 programmed cell death induced by CRISPR (analogous to that observed for type VI systems<sup>10</sup>,  
4 or due to the phage, which may express lethal genes prior to clearance of the infection. To  
5 explore this question, we examined the outcome of targeting plasmid DNA for the cells with  
6 CRISPR-Cas immunity (Fig. 3C and D). The *P. atrosepticum* CRISPR-Cas system effectively  
7 inhibits transformation and conjugation<sup>24</sup>, but those assays fail to assess the outcome for cells  
8 eliciting effective CRISPR immunity (they are killed by the antibiotic). To directly test whether  
9 plasmid targeting by the I-F system reduces cell survival in *P. atrosepticum*, we induced a  
10 mini-CRISPR array with a spacer targeting a plasmid and assessed total cell counts and plasmid  
11 loss. Plasmid targeting decreased cells bearing the plasmid by 10<sup>6</sup>-fold in 18 h but did not  
12 decrease total cell numbers. Hence, these experiments show that the Abi phenotype is phage-  
13 dependent, since cells survived plasmid targeting.

#### 14 *CRISPR-Cas provides population-level protection at low phage doses*

15 Even though an Abi-like phenotype is costly for the infected individual, they may be favoured  
16 by natural selection because of their population-level benefits if these are predominantly  
17 directed at clone mates (i.e. kin selection). To explore these kin-selected benefits, we compared  
18 population growth of cells carrying CRISPR-Cas or Abi under increasing phage pressures  
19 (increasing MOIs) (Fig. S4). Phage sensitive WT *P. atrosepticum* populations were susceptible  
20 to phages at any MOI. The phage effects on population growth were stronger and faster with  
21 increasing phage numbers, but even with an MOI of 0.0001, WT populations collapsed (Fig.  
22 4A). As predicted for an Abi mechanism, cultures containing ToxIN grew with low phage  
23 doses, but when phages equalled or exceeded bacteria (MOI of 1 or higher) population growth  
24 was inhibited. Likewise, CRISPR-Cas immunity enabled population growth at low phage  
25 doses, but at higher MOIs, the populations either collapsed when infected with  $\phi$ M1, or became  
26 static when infected with  $\phi$ TE (Fig. 4A, Fig. S4). We predicted that CRISPR-Cas was  
27 providing population-level protection by reducing the phage epidemic. To test this, the effect  
28 of CRISPR-Cas on phage titres was determined (Fig. 4B). Both phages replicated extensively  
29 on the phage-sensitive WT bacteria, reaching  $\sim 10^{10}$ - $10^{11}$  pfu ml<sup>-1</sup> irrespective of the initial  
30 phage dosage (Fig. 4B). ToxIN reduced the population phage burden regardless of the initial  
31 phage abundance. CRISPR-Cas immunity limited the phage epidemic when initial viral  
32 abundance was low, but when initial phage numbers were higher, CRISPR was unable to  
33 suppress the phage burden. In summary, immunity provided by the type I-F CRISPR-Cas

- 1 system enables population growth under low viral load by reducing virulent phage burden, but
- 2 both CRISPR-Cas and ToxIN fail to cope with high phage pressures.

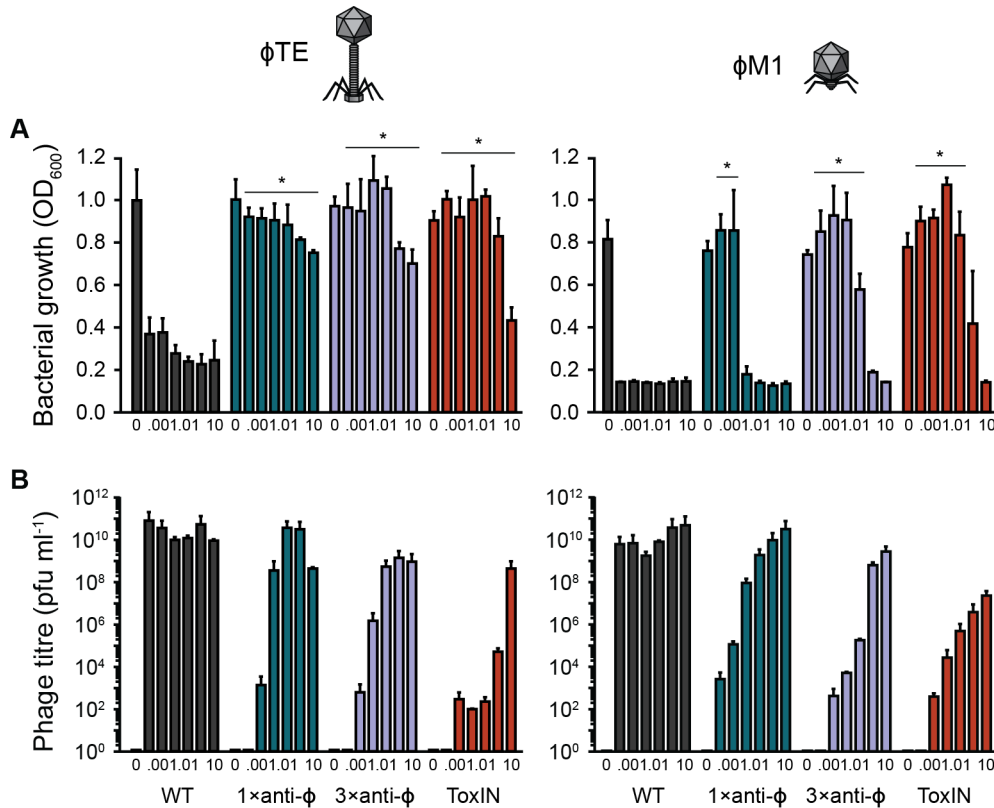

3  
 4 **Figure 4. Populations of anti- $\phi$  strains only grow at low phage doses.** WT, 1× and 3×anti-  
 5  $\phi$  strains, and ToxIN were grown with phages, added at a range of doses (MOIs: 0 (buffer), 10<sup>-</sup>  
 6 <sup>4</sup>, 10<sup>-3</sup>, 10<sup>-2</sup>, 10<sup>-1</sup>, 1, and 10). **A** The final bacterial growth levels (OD<sub>600</sub>) and **B** the final phage  
 7 titres were determined after 16 h. Statistical significance was calculated using one-way  
 8 ANOVA using Dunnett's multiple comparison test, comparing strains with targeting spacers  
 9 to the control with no-targeting spacers. No significance was detected, unless indicated (\* p ≤  
 10 0.05).

11

## 12 Discussion

13 Here we show that the *P. atrosepticum* type I-F CRISPR-Cas system generates an immunity  
 14 phenotype similar to that Abi systems, in which infected cells limit phage propagation and as  
 15 a result, protect neighbouring cells from infection. CRISPR-Cas reduced phage infectivity,  
 16 resulting in fewer infectious centres with reduced phage burst sizes and infected cells did not  
 17 survive, became metabolically inactive and lost membrane integrity. However, population-  
 18 level protection was achieved through CRISPR-Cas-mediated reduction in the phage epidemic.  
 19 Although the CRISPR-Cas response to phage infection has been investigated in other systems,  
 20 they are typically carried out with filamentous phages or virulent mutants of temperate phages,



1 and thought to enhance survival of the infected individual<sup>25-29</sup>. Cell survival was demonstrated  
2 for *S. thermophilus* with a type II-A system<sup>17</sup> and in other studies survival may be inferred  
3 since CRISPR adapted clones grow in the presence of phages<sup>16,30-32</sup>. The observation that the  
4 native *P. atrosepticum* system generates an Abi-phenotype upon infection with two virulent  
5 phages helps to explain previous observations that infection by T7 or T5 virulent phages  
6 targeted by the type I-E system of *Escherichia coli* slowed or inhibited bacterial growth<sup>33</sup>.

7 The ‘suicidal’ response of CRISPR-Cas to phage infection might occur through several  
8 mechanisms<sup>34</sup>. These include: activation of toxic domains found in some Cas proteins, such as  
9 Cas2<sup>35</sup>, off-target effects of the promiscuous RNA-targeting effector proteins from type III<sup>11-13</sup>  
10 and type VI<sup>10</sup> systems, and self-targeting due to increased spacer acquisition following  
11 CRISPR-Cas activation<sup>36</sup>. None of these models explain the Abi phenotype of the type I-F  
12 system in *P. atrosepticum*. For example, *P. atrosepticum* Cas2 does not have detectable  
13 nuclease (i.e. toxic) activity<sup>37</sup> and although we have observed acquisition of self-targeting  
14 spacers, this is at a low frequency that is unlikely to significantly impact cell survival<sup>38</sup>. Indeed,  
15 PCR analysis of CRISPR array expansion following phage infection failed to detect spacer  
16 acquisition (data not shown). Instead, our data suggest that post-infection immunity by  
17 CRISPR-Cas response provides a window of time during which the virulent phage can express  
18 toxic phage products<sup>33</sup>. Temperate and filamentous phages can transmit both horizontally and  
19 vertically and therefore generally avoid immediate early expression of highly toxic genes as  
20 this would be associated with severe fitness trade-offs when the phage enters the lysogenic  
21 cycle. Early expressed virulent phage genes can lead to host DNA degradation, inhibition of  
22 host RNA polymerase and other effects<sup>39,40</sup>. Although the exact mechanism of host cell  
23 takeover for the two phages used in this study is unknown,  $\phi$ M1 encodes its own RNAP,  
24 suggesting a rapid host-takeover, and we have also shown that a gene responsible for triggering  
25 ToxIN immunity is toxic in *P. atrosepticum*<sup>23</sup>. Consistent with our phage-induced growth  
26 inhibition hypothesis, the Abi phenotype was absent during type I-F plasmid targeting.

27 In contrast to our findings, type I-E and I-F CRISPR systems can provide resistance against  
28 temperate and filamentous phages without apparent Abi phenotypes<sup>16,41</sup>. Chronic phage  
29 infection (M13) or obligately lytic temperate phage mutants (e.g. DMS3*vir*) do not rapidly, or  
30 strongly, manipulate bacterial physiology and therefore CRISPR immunity is sufficient to clear  
31 infection and protect the cell. Nonetheless, *P. aeruginosa* deployment of type I-F CRISPR-Cas  
32 causes a bacterial fitness cost, potentially due to decreased replication or repairing the damage  
33 following phage infection<sup>16</sup>. Despite this, CRISPR-Cas was advantageous to *P. aeruginosa*

1 through the generation of diverse immunity against phages<sup>42</sup>. It is not clear how cells containing  
2 a CRISPR system that functions through an Abi-like phenotype can acquire new spacers.  
3 However, by analogy to work in a type II system, the type I-F system may acquire spacers  
4 during infection by defective phages<sup>28</sup>, which might enable phage-resistance to arise when  
5 bacteria are growing in a structured environment<sup>18</sup>. Indeed, Abi systems evolve in spatially  
6 structured environments where clone mates benefit directly<sup>18,43,44</sup> and we predict that the *P.*  
7 *atrosepticum* CRISPR-Cas system will be beneficial under such conditions.

8 The Abi phenotype of this type I-F system strengthens the view that CRISPR-Cas immunity  
9 can sometimes come at the expense of the individual, but providing a benefit for the  
10 population<sup>10,45,46</sup>. The nature of the invading element, the relative efficiency of resistance and  
11 type of CRISPR-Cas system are likely to influence whether CRISPR-Cas provides protection  
12 to the infected individual and the population, or just to the population via Abi. We predict that  
13 virulent phages are more likely to elicit Abi phenotypes, whereas temperate phages or other  
14 mobile elements will be more likely to be cleared and result in cell survival. These outcomes  
15 likely fall on a spectrum determined by the invader vs host immune strength and will need to  
16 be factored in to ecological and evolutionary analyses of CRISPR-Cas immunity.

17

## 18 **Materials and Methods**

### 19 *Bacterial strains, plasmids, and culture conditions*

20 Bacterial strains and plasmids used in this study are given in Table S2. *P. atrosepticum*  
21 SCRI1043<sup>47</sup> was grown at 25°C and *Escherichia coli* at 37°C in Lysogeny Broth (LB) at 180  
22 rpm or on LB-agar (LBA) plates containing 1.5% (w v<sup>-1</sup>) agar. Minimal media contained 40  
23 mM K<sub>2</sub>HPO<sub>4</sub>, 14.6 mM KH<sub>2</sub>PO<sub>4</sub>, 0.4 mM MgSO<sub>4</sub>, 7.6 mM (NH<sub>4</sub>)<sub>2</sub>SO<sub>4</sub> and 0.2% (w v<sup>-1</sup>)  
24 glycerol. When required, media were supplemented with ampicillin (Ap, 100 µg ml<sup>-1</sup>),  
25 kanamycin (Km; 50 µg ml<sup>-1</sup>), isopropyl-β-D-thiogalactopyranoside (IPTG, 0.1 mM), glucose  
26 (glu, 0.2% (v v<sup>-1</sup>)) and arabinose (ara, 0.2% (v v<sup>-1</sup>)). Bacterial growth was measured in a Jenway  
27 6300 spectrophotometer at 600 nm (OD<sub>600</sub>). All experiments were performed in a minimum of  
28 biological triplicates and data shown is the mean + standard deviation.

### 29 *Phage storage and titration*

30 The phages, φTE<sup>22</sup> (genome size of ~142 kb) and φM1<sup>23,48</sup> (genome size of ~43 kb), were  
31 stored in phage buffer (10 mM Tris-HCl pH 7.4, 10 mM MgSO<sub>4</sub> and 0.01% w v<sup>-1</sup> gelatin).

1 Phage stocks were titrated by serially-diluting phages in phage buffer, adding to 100  $\mu$ l of *P.*  
2 *atrosepticum* culture (pre-grown in 5 ml LB overnight) in 4 ml top LBA (0.35% ( $\phi$ TE) and  
3 0.5% ( $\phi$ M1) agar) and pouring onto LBA plates. Plates were incubated at 25°C overnight,  
4 plaques were counted and the titre determined as plaque forming units (pfu)  $\text{ml}^{-1}$ . Efficiency of  
5 plating (EOP) was calculated as: (pfu  $\text{ml}^{-1}$  (test strain) / pfu  $\text{ml}^{-1}$  (control strain, *P.*  
6 *atrosepticum*)). For the following assays (excluding the assays with the crRNA and Cas  
7 overexpression), strains carried the vector, pBR322, to control for ToxIN (which is on the  
8 pBR322 derivative, pTA46).

#### 9 *Efficiency of centre of infection assays (ECOI)*

10 Overnight cultures were OD-adjusted and 1 ml was used to inoculate a 25 ml culture in a 250  
11 ml flask, for a starting OD<sub>600</sub> of 0.1. Cells were grown until early stationary phase (OD<sub>600</sub> of  
12  $\sim$ 0.3) before  $10^9$  total phages ( $\sim 4 \times 10^7$  pfu  $\text{ml}^{-1}$ ) were added at a multiplicity of infection  
13 (MOI) of  $\sim$ 0.1 and cultures were incubated with shaking for 20 min. Aliquots of 1 ml were  
14 extracted, washed twice in 1 $\times$ phosphate-buffered saline (PBS), diluted and plated in top LBA  
15 with *P. atrosepticum* before the infected cells starting lysing. The pfu  $\text{ml}^{-1}$  was determined for  
16 each strain and since each plaque was formed from the phages released from an individual cell,  
17 the titre represents the number of infectious centres formed. The ECOI was calculated as (pfu  
18  $\text{ml}^{-1}$  (test strain) / pfu  $\text{ml}^{-1}$  (control strain, *P. atrosepticum*)). Spontaneous  $\phi$ -resistant surface  
19 mutants, PCF333 and PCF334, were included to control for unadsorbed phages.

#### 20 *One-step growth curves*

21 Overnight cultures were OD-adjusted and 1 ml was used to inoculate a 25 ml culture in a 250  
22 ml flask, for a starting OD<sub>600</sub> of 0.1. Cells were grown until early exponential phase (OD<sub>600</sub> of  
23 0.25-0.35) and  $10^9$  total phages ( $\sim 4 \times 10^7$  pfu  $\text{ml}^{-1}$ ) were added, for an MOI of  $\sim$ 0.1. Duplicate  
24 samples were taken at various timepoints, until 70 min post infection. One sample was plated  
25 immediately (non-treated sample, free phages and phage-infected cells), while the second was  
26 added to phage buffer containing chloroform (treated sample, free phages and phage  
27 accumulated inside infected cells), which lysed the cells, allowing the assessment of the total  
28 number of mature phages at each time point. Samples were diluted in phage buffer and plated  
29 in top LBA with *P. atrosepticum*. Phage adsorption over time was determined from the treated  
30 samples using the equation ((pfu  $\text{ml}^{-1}$  (t=0) - pfu  $\text{ml}^{-1}$  (t=0 to 70)) / pfu  $\text{ml}^{-1}$  (t=0)). The average  
31 phage burst size was also calculated from the treated samples, as number of phages released  
32 ((pfu  $\text{ml}^{-1}$  (t=70) - pfu  $\text{ml}^{-1}$  (t=30)) / the number of cells infected ((pfu  $\text{ml}^{-1}$  (t=0) - pfu  $\text{ml}^{-1}$

1 (t=30)). The latent period was determined from the treated samples as was defined as the time  
2 before the phage burst starts.

### 3 *Cell survival assays*

4 Cells were grown to OD<sub>600</sub> ~0.3 and for each culture, 1 ml was transferred into two universals.  
5 One culture was infected with phages at a MOI of ~2, while the other was mock infected, with  
6 phage buffer. Cultures were shaken at 180 rpm for 20 min for phages to adsorb and then cells  
7 were pelleted and resuspended in PBS to remove unadsorbed phages. Finally, cells were diluted  
8 and 100 µl samples were plated prior to the phage burst (40 min). Cell survival was calculated  
9 as (colony forming units (cfu) ml<sup>-1</sup> (phage treated sample) / cfu ml<sup>-1</sup> (mock treated sample)).

10 To assess cell survival at a range of MOIs, 100 µl of each exponential phase culture was  
11 aliquoted into eight wells of a 96-well flat-bottomed plate for the addition of 10 µl phages at  
12 seven MOIs as well as a mock infection control (phage buffer). Cultures were shaken for 20  
13 min for phages to adsorb, and to reduce the burden of secondary infection, a viricidal solution  
14 called TEAF (per ml: 680 µl of 4.3 mM FeSO<sub>4</sub>, 320 µl 7.5% (w v<sup>-1</sup>) green tea solution (filter-  
15 sterilised)<sup>49</sup>) was then added, at a ratio of 75% (v v<sup>-1</sup>) to each culture. The cultures were then  
16 diluted, more TEAF was added to each dilution and cells were plated as 5 µl spots. Survival  
17 for the φTE-infected cells was higher than predicted from the MOIs used, suggesting that  
18 despite high adsorption rates (Table S1), the phage was not able to infect well in these assays  
19 with high phage doses.

### 20 *LIVE/DEAD staining for membrane activity*

21 Cell membrane integrity was assessed using the LIVE/DEAD™ BacLight™ bacterial viability  
22 kit, consisting of two nucleic acid stains, syto-9 and propidium iodide (Life technologies™).  
23 Cultures were prepared for live/dead staining as described above for the cell survival assays  
24 performed at a range of MOIs. Cells were infected for one hour, to allow for one complete  
25 round of infection, before being stained, according to the manufacturers' instructions. Culture  
26 fluorescence was measured using a Thermo Scientific™ Varioskan™ plate reader, with  
27 excitation / emission wavelengths of 485 / 530 nm for syto-9 and 485 / 630 nm for propidium  
28 iodide. Cultures of exponentially growing cells and cells killed with 70% isopropanol were  
29 combined at different ratios to generate a standard curve, from which the percentage of cells  
30 with intact membranes at each phage MOI could be determined.

## 1 *Resazurin assays for cell activity*

2 For assays assessing cell activity after one round of phage infection, cultures were prepared as  
3 described above for the cell survival assays performed at a range of MOIs. Cells were infected  
4 for one hour before resazurin solution was added at a final concentration of 0.005% (w v<sup>-1</sup>).  
5 Cellular oxidoreductases reduce the blue indicator to resorufin, which is pink. Resorufin  
6 fluorescence was measured 30 min after it was added using a Thermo Scientific™ Varioskan™  
7 plate reader with excitation / emission wavelengths of 510 / 535 nm. Cells for the standard  
8 curve were prepared as described for the live/dead staining, from which the percentage of  
9 metabolically active cells at each MOI was determined. Cell activity was assessed, following  
10 the 16 h growth assays, in the same way.

## 11 *Isolation of spontaneous phage-resistant surface mutant strains*

12  $\phi$ TE and  $\phi$ M1 were plated on *P. atrosepticum* and cells from colonies that formed in the centre  
13 of plaques were streaked to single colonies. Since  $\phi$ TE is flagella-trophic<sup>50</sup>, clones isolated  
14 from plates with  $\phi$ TE were patched onto tryptic swimming agar (10 g Bacto tryptone, 5 g NaCl,  
15 3 g agar, per litre) to assess flagella-mediated swimming. A clone that did not swim (PCF333,  
16 Table S2) was resistant to  $\phi$ TE, but sensitive to  $\phi$ M1, which does not use the flagella for  
17 infection, suggesting that it was a surface mutant. A clone isolated from a  $\phi$ M1 plaque  
18 (PCF334, Table S2) was  $\phi$ M1-resistant, but sensitive to  $\phi$ TE.

## 19 *Construction of the plasmids expressing crRNAs*

20 Spacers present in strains targeting  $\phi$ TE (PCF190) and  $\phi$ M1 (PCF254) were cloned into  
21 pPF975. Overlapping primers containing the spacer sequences were annealed and ligated into  
22 the BsaI site in the mini CRISPR array (repeat-repeat loci) as previously described<sup>51</sup> to form  
23 the plasmids, pPF1421 and pPF1423 (Table S2). Oligonucleotide sequences are listed in Table  
24 S3. All plasmids used in this study were confirmed by sequencing.

## 25 *Construction of the cas overexpression strains*

26 The chromosomal *cas* overexpression strain (PCF610) was made by conjugating the suicide  
27 vector, pPF1814, into *P. atrosepticum*. The vector, pPF1814 was constructed as follows:  
28 pSEVA511 was digested with NotI and ligated with the T5/*lac* promoter and multiple cloning  
29 site (MCS) from pQE-80L-stuffer, which had been amplified with PF3494 and PF3495 and  
30 digested with NotI. The *lacI* gene was amplified from pQE-80L-stuffer (PF2511, PF2512) and

1 ligated into the MCS at XmaI and Sall sites. Finally, the first 500 bp of *casI* was amplified  
2 using PF357 and PF669 and ligated into EcoRI and XmaI sites in the MCS.

### 3 *Plasmid targeting assay*

4 The effect of plasmid targeting on cell survival was assessed using a two-plasmid setup. The  
5 first plasmid was either a control vector (pControl, pPF445, Ap<sup>R</sup>) with an inducible mini  
6 CRISPR array with a single repeat or pCRISPR (pPF452, Ap<sup>R</sup>) carrying a spacer targeting *expl*.  
7 The second plasmid was pTargeted (pPF459, Km<sup>R</sup>), which carried the targeted *expl* gene.  
8 pTargeted was made by PCR-amplifying *expl* from *P. atrosepticum* with PF314 and PF317,  
9 digesting the product with BamHI and PstI and ligating the product into the same sites in  
10 pPF260 (Km<sup>R</sup>-pQE-80L derivative). pControl and pCRISPR were made previously<sup>52</sup>. *P.*  
11 *atrosepticum*  $\Delta$ *expl* (PCF81) was co-transformed with pTargeted and pCRISPR, or pControl,  
12 under CRISPR repressing conditions (0.2% glu) with both antibiotics (Km and Ap). These  
13 strains were for 6 hours in LB, 0.2% glu, Ap + Km with shaking. Cells were pelleted by  
14 centrifugation, washed and the culture was split into two samples, repressed (0.2% glu and Ap)  
15 and induced CRISPR conditions (0.2% ara and Ap). Following growth for a further 18 h, cells  
16 were plated onto Ap (for total cell counts) and Km (for targeted vector-containing cell counts).  
17 Efficiency of plasmid maintenance was calculated from the Km counts as (cfu ml<sup>-1</sup> (pCRISPR)  
18 / cfu ml<sup>-1</sup> (pControl)). Cell survival was calculated for each strain as (cfu ml<sup>-1</sup> (induced) / cfu  
19 ml<sup>-1</sup> (repressed)). The cell counts for the induced CRISPR conditions were higher because the  
20 growth rate of *P. atrosepticum* was increased with supplemented arabinose.

### 21 *Bacterial population growth assays*

22 *P. atrosepticum* cultures were grown to an OD<sub>600</sub> of 0.3 and 100  $\mu$ l was transferred to each well  
23 (of a 96-well plate). Phages were added in 10  $\mu$ l at multiplicities of infection (MOIs) ranging  
24 from 0.0001 to 10 and cultures were grown in a Thermo Scientific™ Varioskan™ plate reader  
25 with shaking at 480 rpm. Cell density was monitored for 16 h, measuring OD<sub>600</sub> every 12 min.  
26 Following growth, final phage titres were determined by chloroform treating the bacterial  
27 cultures and titrating the phages. The data were processed using GraphPad Prism to generate  
28 restricted cubic spline curves (324 points were calculated).

### 29 *Data availability statement*

30 The data that support the findings of this study are available from the corresponding author  
31 upon reasonable request.

1

## 2 **Acknowledgements**

3 This work was supported by a Rutherford Discovery Fellowship from the Royal Society of  
4 New Zealand (PCF), the Marsden Fund, RSNZ, the Bio-protection Research Centre (Tertiary  
5 Education Commission), a University of Otago Doctoral Scholarship (to BNJW), a Veni grant  
6 from the Netherlands Organization for Scientific Research (NWO) [016.Veni.171.047 to  
7 RHJS] and a Health Sciences Career Development Award from the University of Otago (to  
8 RHJS). The funders had no role in study design, data collection and interpretation, or the  
9 decision to submit the work for publication. Thanks to Josh Ramsay for providing plasmid  
10 pQE-80L-stuffer. We thank members of the Fineran laboratory for useful discussions.

11

## 12 **References**

- 13 1 Labrie, S. J., Samson, J. E. & Moineau, S. Bacteriophage resistance mechanisms. *Nat*  
14 *Rev Microbiol* **8**, 317-327, doi:10.1038/nrmicro2315 (2010).
- 15 2 Dy, R. L., Richter, C., Salmond, G. P. C. & Fineran, P. C. Remarkable mechanisms in  
16 microbes to resist viral infections. *Annual Review of Virology* **1**, 307-331,  
17 doi:10.1146/annurev-virology-031413-085500 (2014).
- 18 3 van Houte, S., Buckling, A. & Westra, E. R. Evolutionary Ecology of Prokaryotic  
19 Immune Mechanisms. *Microbiol Mol Biol Rev* **80**, 745-763,  
20 doi:10.1128/MMBR.00011-16 (2016).
- 21 4 Jackson, S. A. *et al.* CRISPR-Cas: Adapting to change. *Science* **356**, eaal5056,  
22 doi:10.1126/science.aal5056 (2017).
- 23 5 Hille, F. & Charpentier, E. CRISPR-Cas: biology, mechanisms and relevance. *Philos*  
24 *Trans R Soc Lond B Biol Sci* **371**, doi:10.1098/rstb.2015.0496 (2016).
- 25 6 Makarova, K. S. *et al.* An updated evolutionary classification of CRISPR-Cas  
26 systems. *Nat Rev Microbiol* **13**, 722-736, doi:10.1038/nrmicro3569 (2015).
- 27 7 Koonin, E. V., Makarova, K. S. & Zhang, F. Diversity, classification and evolution of  
28 CRISPR-Cas systems. *Curr Opin Microbiol* **37**, 67-78,  
29 doi:10.1016/j.mib.2017.05.008 (2017).
- 30 8 Koonin, E. V. & Makarova, K. S. Origins and evolution of CRISPR-Cas systems.  
31 *Philos Trans R Soc Lond B Biol Sci* **374**, 20180087, doi:10.1098/rstb.2018.0087  
32 (2019).
- 33 9 Abudayyeh, O. O. *et al.* C2c2 is a single-component programmable RNA-guided  
34 RNA-targeting CRISPR effector. *Science* **353**, aaf5573, doi:10.1126/science.aaf5573  
35 (2016).
- 36 10 Meeske, A. J., Nakandakari-Higa, S. & Marraffini, L. A. Cas13-induced cellular  
37 dormancy prevents the rise of CRISPR-resistant bacteriophage. *Nature*,  
38 doi:10.1038/s41586-019-1257-5 (2019).
- 39 11 Jiang, W., Samai, P. & Marraffini, L. A. Degradation of phage transcripts by  
40 CRISPR-associated RNases enables type III CRISPR-Cas immunity. *Cell* **164**, 710-  
41 721, doi:10.1016/j.cell.2015.12.053 (2016).

- 1 12 Niewoehner, O. *et al.* Type III CRISPR-Cas systems produce cyclic oligoadenylate  
2 second messengers. *Nature* **548**, 543-548, doi:10.1038/nature23467 (2017).
- 3 13 Kazlauskienė, M., Kostiuk, G., Venclovas, Č., Tamulaitis, G. & Siksnys, V. A cyclic  
4 oligonucleotide signaling pathway in type III CRISPR-Cas systems. *Science* **357**, 605  
5 (2017).
- 6 14 Varble, A. & Marraffini, L. A. Three New Cs for CRISPR: Collateral, Communicate,  
7 Cooperate. *Trends in genetics : TIG* **35**, 446-456, doi:10.1016/j.tig.2019.03.009  
8 (2019).
- 9 15 Bernheim, A., Bikard, D., Touchon, M. & Rocha, E. P. C. Co-occurrence of multiple  
10 CRISPRs and *cas* clusters suggests epistatic interactions.  
11 *bioRxiv*, 592600, doi:10.1101/592600 (2019).
- 12 16 Westra, E. R. *et al.* Parasite exposure drives selective evolution of constitutive versus  
13 inducible defense. *Curr Biol* **25**, 1043-1049, doi:10.1016/j.cub.2015.01.065 (2015).
- 14 17 Deveau, H. *et al.* Phage response to CRISPR-encoded resistance in *Streptococcus*  
15 *thermophilus*. *J Bacteriol* **190**, 1390-1400, doi:10.1128/JB.01412-07 (2008).
- 16 18 Berngruber, T. W., Lion, S. & Gandon, S. Evolution of suicide as a defence strategy  
17 against pathogens in a spatially structured environment. *Ecol Lett* **16**, 446-453,  
18 doi:10.1111/ele.12064 (2013).
- 19 19 Przybilski, R. *et al.* Csy4 is responsible for CRISPR RNA processing in  
20 *Pectobacterium atrosepticum*. *RNA Biol* **8**, 517-528 (2011).
- 21 20 Richter, C., Gristwood, T., Clulow, J. S. & Fineran, P. C. In vivo protein interactions  
22 and complex formation in the *Pectobacterium atrosepticum* subtype I-F CRISPR/Cas  
23 System. *PLoS One* **7**, e49549, doi:10.1371/journal.pone.0049549 (2012).
- 24 21 Fineran, P. C. *et al.* The phage abortive infection system, ToxIN, functions as a  
25 protein-RNA toxin-antitoxin pair. *Proc Natl Acad Sci U S A* **106**, 894-899,  
26 doi:10.1073/pnas.0808832106 (2009).
- 27 22 Blower, T. R., Evans, T. J., Przybilski, R., Fineran, P. C. & Salmond, G. P. C. Viral  
28 evasion of a bacterial suicide system by RNA-based molecular mimicry enables  
29 infectious altruism. *PLoS Genet* **8**, e1003023, doi:10.1371/journal.pgen.1003023  
30 (2012).
- 31 23 Blower, T. R. *et al.* Evolution of *Pectobacterium* bacteriophage phiM1 to escape two  
32 bifunctional type III toxin-antitoxin and abortive infection systems through mutations  
33 in a single viral gene. *Appl Environ Microbiol* **83**, e03229-03216,  
34 doi:10.1128/AEM.03229-16 (2017).
- 35 24 Richter, C. *et al.* Priming in the Type I-F CRISPR-Cas system triggers strand-  
36 independent spacer acquisition, bi-directionally from the primed protospacer. *Nucleic*  
37 *Acids Res* **42**, 8516-8526, doi:10.1093/nar/gku527 (2014).
- 38 25 Brouns, S. J. *et al.* Small CRISPR RNAs guide antiviral defense in prokaryotes.  
39 *Science* **321**, 960-964, doi:10.1126/science.1159689 (2008).
- 40 26 Semenova, E. V., Jore, M. M., Westra, E. R., Oost, v. d. J. & Brouns, S. J. J.  
41 Interference by clustered regularly interspaced short palindromic repeat (CRISPR)  
42 RNA is governed by a seed sequence. *Proc Natl Acad Sci U S A* **108**, 10098-18424  
43 (2011).
- 44 27 Millen, A. M., Horvath, P., Boyaval, P. & Romero, D. A. Mobile CRISPR/Cas-  
45 mediated bacteriophage resistance in *Lactococcus lactis*. *PLoS One* **7**, e51663,  
46 doi:10.1371/journal.pone.0051663 (2012).
- 47 28 Hynes, A. P., Villion, M. & Moineau, S. Adaptation in bacterial CRISPR-Cas  
48 immunity can be driven by defective phages. *Nat Commun* **5**, 4399,  
49 doi:10.1038/ncomms5399 (2014).



- 1 29 Box, A. M., McGuffie, M. J., O'Hara, B. J. & Seed, K. D. Functional analysis of  
2 bacteriophage immunity through a Type I-E CRISPR-Cas system in *Vibrio cholerae*  
3 and its application in bacteriophage genome engineering. *J Bacteriol* **198**, 578-590,  
4 doi:10.1128/JB.00747-15 (2015).
- 5 30 Paez-Espino, D. *et al.* CRISPR immunity drives rapid phage genome evolution in  
6 *Streptococcus thermophilus*. *MBio* **6**, e00262-00215, doi:10.1128/mBio.00262-15  
7 (2015).
- 8 31 Modell, J. W., Jiang, W. & Marraffini, L. A. CRISPR-Cas systems exploit viral DNA  
9 injection to establish and maintain adaptive immunity. *Nature* **544**, 101-104,  
10 doi:10.1038/nature21719 (2017).
- 11 32 Pyenson, N. C., Gayvert, K., Varble, A., Elemento, O. & Marraffini, L. A. Broad  
12 targeting specificity during bacterial type III CRISPR-Cas immunity constrains viral  
13 escape. *Cell Host Microbe* **22**, 343-353 e343, doi:10.1016/j.chom.2017.07.016  
14 (2017).
- 15 33 Strotskaya, A. *et al.* The action of *Escherichia coli* CRISPR-Cas system on lytic  
16 bacteriophages with different lifestyles and development strategies. *Nucleic Acids Res*  
17 **45**, 1946-1957, doi:10.1093/nar/gkx042 (2017).
- 18 34 Koonin, E. V. & Zhang, F. Coupling immunity and programmed cell suicide in  
19 prokaryotes: Life-or-death choices. *Bioessays* **39**, 1-9, doi:10.1002/bies.201600186  
20 (2017).
- 21 35 Makarova, K. S., Anantharaman, V., Aravind, L. & Koonin, E. V. Live virus-free or  
22 die: coupling of antiviral immunity and programmed suicide or dormancy in  
23 prokaryotes. *Biology Direct* **7**, 40-40, doi:10.1186/1745-6150-7-40 (2012).
- 24 36 Kumar, M. S., Plotkin, J. B. & Hannenhalli, S. Regulated CRISPR modules exploit a  
25 dual defense strategy of restriction and abortive infection in a model of prokaryote-  
26 phage coevolution. *PLoS Comput Biol* **11**, e1004603,  
27 doi:10.1371/journal.pcbi.1004603 (2015).
- 28 37 Fagerlund, R. D. *et al.* Spacer capture and integration by a type I-F Cas1-Cas2-3  
29 CRISPR adaptation complex. *Proc Natl Acad Sci U S A* **114**, E5122-e5128,  
30 doi:10.1073/pnas.1618421114 (2017).
- 31 38 Staals, R. H. *et al.* Interference-driven spacer acquisition is dominant over naive and  
32 primed adaptation in a native CRISPR-Cas system. *Nat Commun* **7**, 12853,  
33 doi:10.1038/ncomms12853 (2016).
- 34 39 Davison, J. Pre-early functions of bacteriophage T5 and its relatives. *Bacteriophage* **5**,  
35 e1086500, doi:10.1080/21597081.2015.1086500 (2015).
- 36 40 Blasdel, B. G., Chevallereau, A., Monot, M., Lavigne, R. & Debarbieux, L.  
37 Comparative transcriptomics analyses reveal the conservation of an ancestral  
38 infectious strategy in two bacteriophage genera. *The ISME journal* **11**, 1988-1996,  
39 doi:10.1038/ismej.2017.63 (2017).
- 40 41 Datsenko, K. A. *et al.* Molecular memory of prior infections activates the  
41 CRISPR/Cas adaptive bacterial immunity system. *Nat Commun* **3**, 945,  
42 doi:10.1038/ncomms1937 (2012).
- 43 42 van Houte, S. *et al.* The diversity-generating benefits of a prokaryotic adaptive  
44 immune system. *Nature* **532**, 385-388, doi:10.1038/nature17436 (2016).
- 45 43 Debarre, F., Lion, S., van Baalen, M. & Gandon, S. Evolution of host life-history  
46 traits in a spatially structured host-parasite system. *Am Nat* **179**, 52-63,  
47 doi:10.1086/663199 (2012).
- 48 44 Fukuyo, M., Sasaki, A. & Kobayashi, I. Success of a suicidal defense strategy against  
49 infection in a structured habitat. *Sci Rep* **2**, 238, doi:10.1038/srep00238 (2012).

- 1 45 Payne, P., Geyrhofer, L., Barton, N. H. & Bollback, J. P. CRISPR-based herd  
2 immunity can limit phage epidemics in bacterial populations. *eLife* **7**, e32035,  
3 doi:10.7554/eLife.32035 (2018).
- 4 46 Watson, B. N. J., Staals, R. H. J. & Fineran, P. C. CRISPR-Cas-mediated phage  
5 resistance enhances horizontal gene transfer by transduction. *mBio* **9**, e02406-02417,  
6 doi:10.1128/mBio.02406-17 (2018).
- 7 47 Bell, K. S. *et al.* Genome sequence of the enterobacterial phytopathogen *Erwinia*  
8 *carotovora* subsp. *atroseptica* and characterization of virulence factors. *Proc Natl*  
9 *Acad Sci U S A* **101**, 11105-11110, doi:10.1073/pnas.0402424101 (2004).
- 10 48 Toth, I. K. *et al.* Generalized transduction in the potato blackleg pathogen *Erwinia*  
11 *carotovora* subsp. *atroseptica* by bacteriophage phiM1. *Microbiology* **143**, 2433  
12 (1997).
- 13 49 de Siqueira, R. S., Dodd, C. E. & Rees, C. E. Evaluation of the natural virucidal  
14 activity of teas for use in the phage amplification assay. *Int J Food Microbiol* **111**,  
15 259-262, doi:10.1016/j.ijfoodmicro.2006.04.047 (2006).
- 16 50 Evans, T. J. *Investigation of bacteriophages and their use in the analysis of*  
17 *enterobacterial virulence* PhD thesis, University of Cambridge, (2010).
- 18 51 Jackson, S. A., Birkholz, N., Malone, L. M. & Fineran, P. C. Imprecise Spacer  
19 Acquisition Generates CRISPR-Cas Immune Diversity through Primed Adaptation.  
20 *Cell Host Microbe* **25**, 250-260 e254, doi:10.1016/j.chom.2018.12.014 (2019).
- 21 52 Vercoe, R. B. *et al.* Cytotoxic chromosomal targeting by CRISPR/Cas systems can  
22 reshape bacterial genomes and expel or remodel pathogenicity islands. *PLoS Genet* **9**,  
23 e1003454, doi:10.1371/journal.pgen.1003454 (2013).

24  
25
